# Supplementary material for: The Endoplasmic Reticulum Cargo Receptor FgErv14 Regulates DON Production, Growth and Virulence in Fusarium graminearum
Source: MDPI journal article supplement (doi:10.3390/life12060799), 2022-05-27
Supplement: s1 [file s1]

## Supplementary Information

### The endoplasmic reticulum cargo receptor FgErv14 regulates DON production, growth and virulence in *Fusarium graminearum*

Sun *et al.*

**Table S1. *F. graminearum* strains used in this study**

| Strain | Genotype                                                           | Source     | Figures                                                       |
|--------|--------------------------------------------------------------------|------------|---------------------------------------------------------------|
| FDH69  | PH-1 (Wide Type)                                                   | [70]       | Fig.2A-C Fig.3A-D<br>Fig.5A-B Fig.6A-B<br>Fig.S2B<br>Fig.3A-B |
| FHD655 | PH-1, $\Delta Fgerv14::HYG$ #3                                     | This study | Fig.2A-C Fig.4A-D<br>Fig.5A-B Fig.6A-B<br>Fig.S2B Fig.3A-B    |
| FHD657 | PH-1, $\Delta Fgerv14::HYG$ #4                                     | This study | Fig.2A-C Fig.S2B                                              |
| FHD500 | FHD657, <i>FgERV14-GFP::KAN</i>                                    | This study | Fig.2A-C Fig.4A-D<br>Fig.5A-B Fig.6A-B<br>Fig.S2B<br>Fig.3A-B |
| FHD581 | PH-1, <i>TRI4-GFP::KAN</i>                                         | This study | Fig.6C                                                        |
| FHD818 | FHD657, <i>TRI4-GFP::KAN</i>                                       | This study | Fig.6C                                                        |
| FHD635 | PH-1, <i>FgERV14-GFP::KAN</i> ,<br><i>FgSEC61-mCherry::NAT</i>     | This study | Fig.7A                                                        |
| FHD651 | PH-1, <i>FgERV14-GFP::KAN</i> , <i>TRI4-mCherry::NAT</i>           | This study | Fig.7B                                                        |
| FHD551 | PH-1, <i>FgRUD3-GFP::KAN</i> ,<br><i>FgSED5-mCherry::NAT</i>       | [2]        | Fig.8A                                                        |
| FHD808 | FHD657, <i>FgRUD3-GFP::KAN</i> ,<br><i>FgSED5-mCherry::NAT</i>     | This study | Fig.8A                                                        |
| FHD569 | PH-1, <i>mCherry-FgKEX2::KAN</i> ,<br><i>GFP-FgSNC1-PEM::NAT</i>   | This study | Fig.8B                                                        |
| FHD960 | FHD657, <i>mCherry-FgKEX2::KAN</i> ,<br><i>GFP-FgSNC1-PEM::NAT</i> | This study | Fig.8B                                                        |

## Supplementary Figures

A

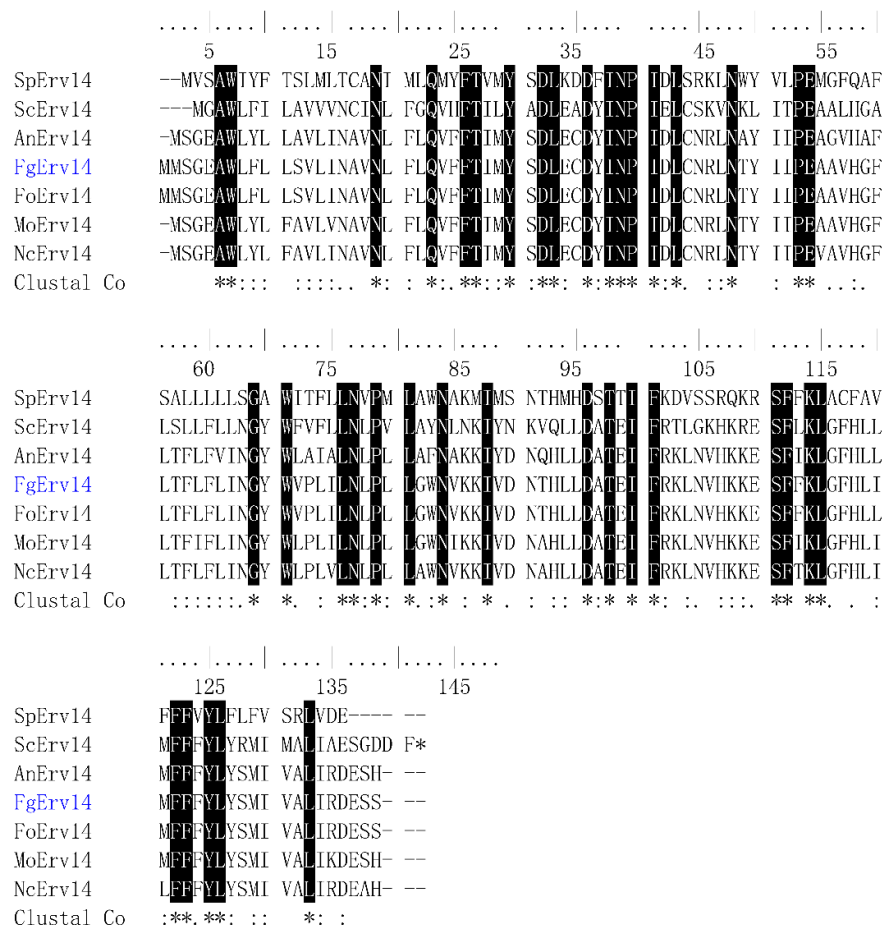

B

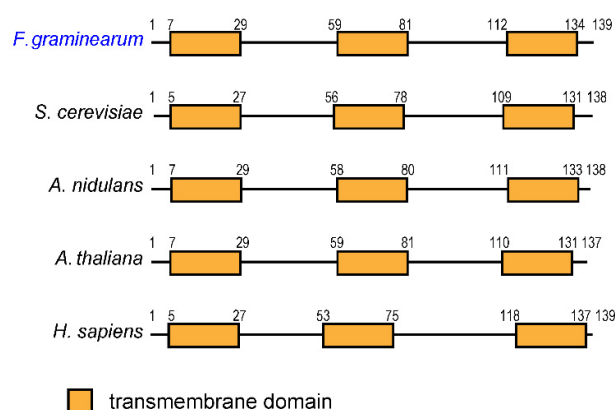

**Figure S1.** Amino-acid sequence and domain alignment of Erv14. (A) Identical segments are indicated by a black background. The compared sequences were from *F. graminearum*, *F. oxysporum*, *M. oryzae*, *N. crassa*, *A. nidulans*, *S. cerevisiae*, and *S. pombe*. (B) Conserved domains of Erv14 proteins are found in *F. graminearum*, *S. cerevisiae*, *A. nidulans*, *A. thaliana* and *H.sapiens*.

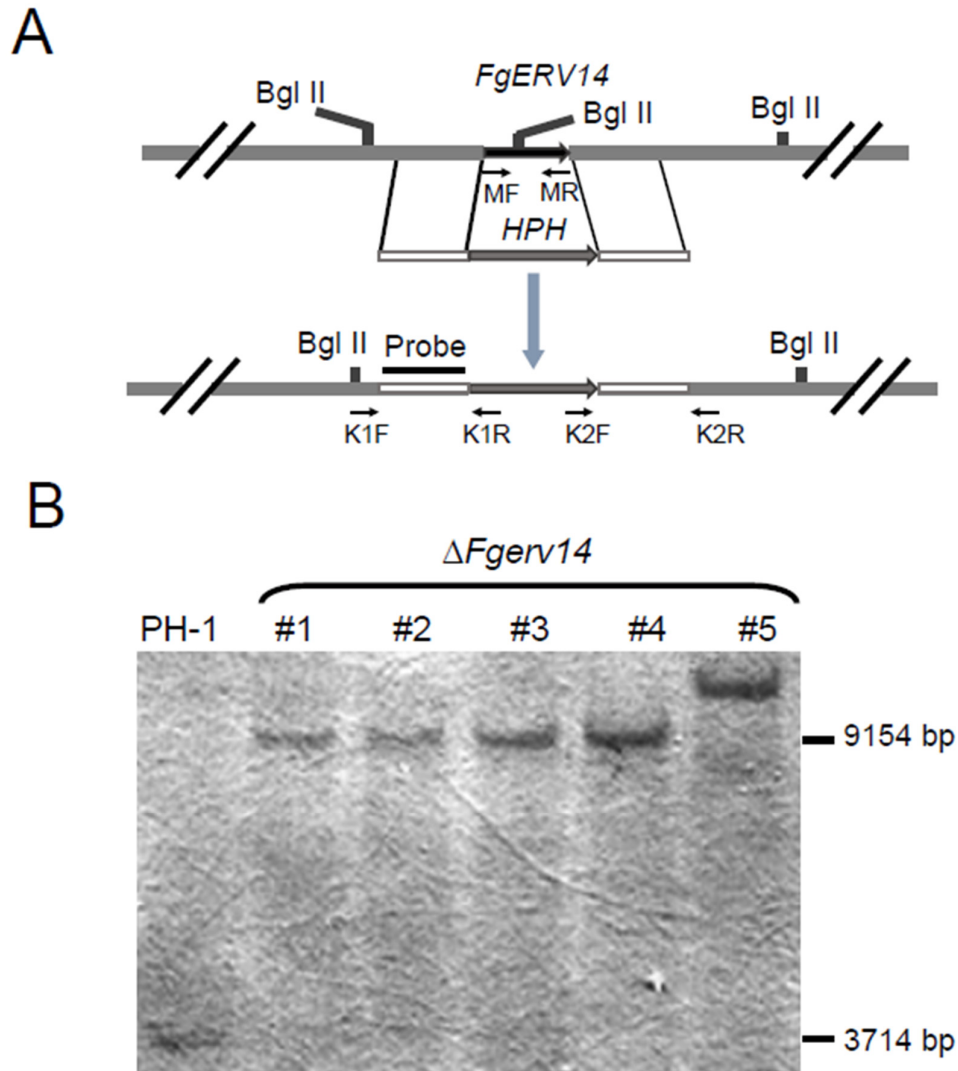

**Figure S2.** Generation and verification of *FgERV14*-deletion mutants. (A) Strategy for achieving *FgERV14* deletion in *F. graminearum*. The *FgERV14* gene was replaced by a cassette containing a *HPH* gene. (B) Southern blot analysis of WT PH-1 and  $\Delta Fgerv14$  mutants (#1–5). Genomic DNA was digested with *Bgl*II.
